# Supplementary material
Source: PubMed Central journal article supplement (PMC8411451)

# Adiposity and Interstitial Lung Abnormalities in Community-Dwelling Adults

## The MESA Cohort Study

*Michaela R. Anderson, MD; John S. Kim, MD; Matthew Allison, MD, MPH;  
Jon T. Giles, MD, MPH; Eric A. Hoffman, PhD; Jingzhong Ding, PhD;  
R. Graham Barr, MD, DrPH; and Anna Podolanczuk, MD*

CHEST 2021; 160(2):582-594

*Online supplements are not copyedited prior to posting and the author(s) take full responsibility for the accuracy of all data.*

© 2021 AMERICAN COLLEGE OF CHEST PHYSICIANS. Reproduction of this article is prohibited without written permission from the American College of Chest Physicians. See online for more details. DOI: 10.1016/j.chest.2021.03.058

# CHEST<sup>®</sup> Online Supplement

## **e-Appendix 1:** IRB Approval numbers by site

Columbia University: IRB-AAAA7791

University of California Los Angeles: 99-11-057-23B

Johns Hopkins University: NA\_00030361\_AM00004951

University of Minnesota: 9805M00034

Wake Forest University: BG00-035

Northwestern University: STU00021057

University of Vermont: 09-971

**e-Table 1:** Timeline for MESA study visits and procedures performed which are included in this analysis

| <b><u>Exam Number</u></b> | <b><u>Years</u></b> | <b><u>Procedures performed and included in this analysis</u></b> |
|---------------------------|---------------------|------------------------------------------------------------------|
| 1                         | 2000-2002           | Cardiac CT: High Attenuation Areas and PAT volume                |
| 2                         | 2002-2003           | Abdominal CT: abdominal VAT and abdominal SAT                    |
| 3                         | 2004-2005           | Spirometry, Biomarkers, Abdominal CT: abdominal VAT and SAT      |
| 4                         | 2005-2007           | Spirometry                                                       |
| 5                         | 2010-2012           | Full Lung CT: Interstitial Lung Abnormalities                    |
| 6                         | 2016-2018           | No procedures included in this analysis                          |

**Definition of abbreviations:** CT: computed tomography scan; PAT: pericardial adipose tissue VAT: visceral adipose tissue; SAT: subcutaneous adipose tissue

**e-Table 2:** Characteristics of subjects included in the full, abdominal VAT, ILA, and FVC cohorts.

|                                               | <b>PAT Cohort<br/>(N=6784)</b> | <b>VAT Cohort<br/>(N=1923)</b> | <b>ILA Measured<br/>(N=2423)</b> | <b>FVC Measured<br/>(N=1415)</b> |
|-----------------------------------------------|--------------------------------|--------------------------------|----------------------------------|----------------------------------|
| Age                                           | 62 (53-70)                     | 65 (57-73)                     | 59 (52-67)                       | 64 (56-72)                       |
| Male                                          | 3192 (47)                      | 964 (50)                       | 1140 (47)                        | 730 (52)                         |
| Race                                          |                                |                                |                                  |                                  |
| Caucasian                                     | 2615 (39)                      | 771 (40)                       | 951 (39)                         | 580 (41)                         |
| Asian                                         | 797 (12)                       | 251 (13)                       | 333 (14)                         | 215 (15)                         |
| African-American                              | 1884 (28)                      | 404 (21)                       | 636 (26)                         | 268 (19)                         |
| Hispanic                                      | 1488 (22)                      | 497 (26)                       | 503 (21)                         | 352 (25)                         |
| Weight (kg)                                   | 77 (66-89)                     | 77 (66-90)                     | 77 (66-90)                       | 77 (66-89)                       |
| Height (cm)                                   | 166 (159-174)                  | 167 (159-174.)                 | 166 (159-174)                    | 167 (160-175)                    |
| BMI (kg/m <sup>2</sup> )                      | 27.6 (24.5-31.2)               | 27.4 (24.5-30.8)               | 27.5 (24.5-31.0)                 | 27.2 (24.3-30.7)                 |
| BMI category                                  |                                |                                |                                  |                                  |
| <18.5                                         | 58 (1)                         | 13 (1)                         | 14 (1)                           | 12 (1)                           |
| 18.5-25.0                                     | 1886 (28)                      | 528 (38)                       | 690 (28)                         | 418 (30)                         |
| 25.0-30.0                                     | 2654 (39)                      | 757 (39)                       | 956 (39)                         | 577 (41)                         |
| 30-35                                         | 1424 (21)                      | 381 (20)                       | 509 (21)                         | 285 (20)                         |
| >35                                           | 762 (11)                       | 244 (13)                       | 10 (254)                         | 123 (9)                          |
| Smoking Status                                |                                |                                |                                  |                                  |
| Never Smoker                                  | 3401 (50)                      | 843 (46)                       | 1337 (55)                        | 653 (46)                         |
| Former Smoker                                 | 2475 (36)                      | 800 (43)                       | 819 (34)                         | 588 (42)                         |
| Current Smoker                                | 886 (13)                       | 202 (11)                       | 263 (11)                         | 164 (12)                         |
| Pack-years                                    | 15 (5-32)                      | 16 (6-32)                      | 13 (3-29)                        | 14 (3-29)                        |
| Pericardial adipose volume (cm <sup>3</sup> ) | 71 (49-100)                    | 72 (51-101)                    | 68 (48-95)                       | 71 (50-99)                       |
| Abdominal VAT area (cm <sup>2</sup> )         | 137 (97-193)                   | 137 (97-193)                   | 135 (97-186)                     | 136 (96-188)                     |
| Abdominal SAT area (cm <sup>2</sup> )         | 236 (170-310)                  | 236 (170-309)                  | 242 (174-319)                    | 235 (170-309)                    |

Continuous variables reported as median (interquartile range)

Categorical variables reported as N (%)

Missing: Full PAT cohort is missing smoking status on 22 subjects, and pack-years on 94 subjects.

**Definition of abbreviations:** BMI: body mass index; PAT: pericardial adipose tissue; VAT: visceral adipose tissue; SAT: subcutaneous adipose tissue; ILA: interstitial lung abnormalities; FVC: forced vital capacity.

**e-Table 3:** Spearman correlations between adipose tissue depots and traditional measures of body composition

|                 | <b>Pericardial AT</b> | <b>Abdominal VAT</b> | <b>Abdominal SAT</b> |
|-----------------|-----------------------|----------------------|----------------------|
| Abdominal VAT   | 0.67*                 | 1                    |                      |
| Abdominal SAT   | 0.20*                 | 0.33*                | 1                    |
| Body Mass Index | 0.51*                 | 0.57*                | 0.69*                |
| Height          | 0.16*                 | 0.17*                | -0.14*               |
| Weight          | 0.48*                 | 0.54*                | 0.46*                |

\*indicates  $p < 0.0001$

**e-Table 4:** Associations between abdominal subcutaneous adipose tissue area and high attenuation areas, interstitial lung abnormalities, and forced vital capacity in subjects in whom abdominal SAT was completely imaged.

| <b>SAT</b> | <b>N</b> | <b>Change in HAA per doubling in SAT area</b> | <b>95% CI</b> | <b>p-value</b> | <b>N</b> | <b>Odds of ILA per doubling in SAT area</b> | <b>95% CI</b> | <b>P-value</b> | <b>N</b> | <b>Change in FVC per doubling in SAT area</b> | <b>95% CI</b> | <b>p-value</b> |
|------------|----------|-----------------------------------------------|---------------|----------------|----------|---------------------------------------------|---------------|----------------|----------|-----------------------------------------------|---------------|----------------|
| Model 1    | 1006     | 13.0                                          | -9.7 to 35.6  | 0.26           | 523      | 1.1                                         | 0.7 to 1.6    | 0.66           | 847      | -4.9                                          | -6.4 to -3.4  | <0.001         |
| Model 2    | 865      | 54.2                                          | 33.4 to 75.0  | <0.001         | 487      | 0.9                                         | 0.6 to 1.4    | 0.65           | 840      | -5.3                                          | -6.9 to -3.6  | <0.001         |
| Model 3    | 865      | 42.2                                          | 19.3 to 65.0  | <0.001         | 487      | 0.7                                         | 0.4 to 1.3    | 0.27           | 840      | -2.7                                          | -4.5 to -0.8  | 0.004          |

**Definition of abbreviations:** SAT: subcutaneous adipose tissue; HAA: high attenuation areas operationalized as (-1/percent HAA<sup>2</sup>); ILA: interstitial lung abnormalities; SD: standard deviation; CI: confidence interval

Model 1: HAA analyses adjusted for study site, imaged lung volume, and radiation dose; ILA and FVC analyses are unadjusted

Model 2: Model 1 + age, sex, race, height, smoking status, percent emphysema, and cigarette pack-years

Model 3: Model 2 + visceral adipose tissue area

**e-Table 5:** Associations of abdominal visceral and subcutaneous adipose tissue area as measured at L3/L4 with high attenuation areas, interstitial lung abnormalities, and forced vital capacity.

| <b>VAT</b> | <b>Change in HAA per doubling in VAT area</b> |               |                |        | <b>Odds of ILA per doubling in VAT area</b> |               |                |      | <b>Change in FVC (percent predicted) per doubling in VAT area</b> |               |                |        |
|------------|-----------------------------------------------|---------------|----------------|--------|---------------------------------------------|---------------|----------------|------|-------------------------------------------------------------------|---------------|----------------|--------|
|            | <b>N</b>                                      | <b>95% CI</b> | <b>p-value</b> |        | <b>N</b>                                    | <b>95% CI</b> | <b>p-value</b> |      | <b>N</b>                                                          | <b>95% CI</b> | <b>p-value</b> |        |
| Model 1    | 1895                                          | 70.8          | 58.4 to 83.2   | <0.001 | 848                                         | 1.1           | 0.9 to 1.4     | 0.43 | 1403                                                              | -3.2          | -4.1 to -2.2   | <0.001 |
| Model 2    | 1812                                          | 45.5          | 33.9 to 57.1   | <0.001 | 832                                         | 1.0           | 0.7 to 1.3     | 0.93 | 1388                                                              | -4.5          | -5.5 to -3.5   | <0.001 |
| Model 3    | 1552                                          | 32.6          | 17.5 to 47.7   | <0.001 | 723                                         | 1.2           | 0.8 to 1.8     | 0.39 | 1217                                                              | -3.2          | -4.6 to -1.9   | <0.001 |
| <b>SAT</b> | <b>Change in HAA per doubling in SAT area</b> |               |                |        | <b>Odds of ILA per doubling in SAT area</b> |               |                |      | <b>Change in FVC per doubling in SAT area</b>                     |               |                |        |
|            | <b>N</b>                                      | <b>95% CI</b> | <b>p-value</b> |        | <b>N</b>                                    | <b>95% CI</b> | <b>p-value</b> |      | <b>N</b>                                                          | <b>95% CI</b> | <b>p-value</b> |        |
| Model 1    | 1613                                          | 26.3          | 8.7 to 43.9    | 0.003  | 738                                         | 0.9           | 0.7 to 1.3     | 0.70 | 1229                                                              | -4.6          | -5.8 to -3.9   | <0.001 |
| Model 2    | 1552                                          | 49.3          | 34.0 to 64.5   | <0.001 | 723                                         | 0.9           | 0.6 to 1.3     | 0.49 | 1217                                                              | -4.5          | -5.8 to -3.2   | <0.001 |
| Model 3    | 1552                                          | 36.2          | 19.4 to 53.0   | <0.001 | 723                                         | 0.8           | 0.5 to 1.2     | 0.29 | 1217                                                              | -2.2          | -3.8 to -0.7   | 0.005  |

**Definition of abbreviations:** BMI: body mass index; SAT: subcutaneous adipose tissue; CI: confidence interval; HAA: high attenuation areas; ILA: interstitial lung abnormalities; FVC: forced vital capacity

Model 1: HAA analyses adjusted for study site, imaged lung volume, and radiation dose; ILA and FVC analyses are unadjusted

Model 2: Model 1 + age, sex, race, smoking status, percent emphysema, cigarette pack-years, and site

Model 3: Model 2 + visceral adipose tissue area

**e-Table 6:** Associations between subcutaneous adipose tissue area and high attenuation areas and interstitial lung abnormalities within pre-specified subgroups

|                                | N   | Change in HAA per doubling in SAT area | 95% CI        | P for interaction | N   | Change in ILA per doubling in SAT area | 95% CI     | P for interaction | N   | Change in percent predicted FVC per doubling in SAT area | 95% CI        | P for interaction |
|--------------------------------|-----|----------------------------------------|---------------|-------------------|-----|----------------------------------------|------------|-------------------|-----|----------------------------------------------------------|---------------|-------------------|
| <b>Sex</b>                     |     |                                        |               | 0.56              |     |                                        |            | 0.16              |     |                                                          |               | 0.051             |
| Male                           | 786 | 61.0                                   | 38.2 to 83.7  |                   | 361 | 0.9                                    | 0.5 to 1.6 |                   | 635 | -6.0                                                     | -7.9 to -4.2  |                   |
| Female                         | 776 | 47.1                                   | 21.2 to 72.9  |                   | 365 | 1.2                                    | 0.6 to 2.4 |                   | 594 | -4.3                                                     | -6.4 to -2.2  |                   |
| <b>Age</b>                     |     |                                        |               | 0.74              |     |                                        |            | 0.41              |     |                                                          |               | 0.07              |
| <65                            | 923 | 52.2                                   | 30.7 to 73.6  |                   | 508 | 0.8                                    | 0.5 to 1.3 |                   | 764 | -6.0                                                     | -7.5 to -4.5  |                   |
| ≥65                            | 639 | 63.7                                   | 34.0 to 93.5  |                   | 218 | 1.8                                    | 0.9 to 3.6 |                   | 465 | -4.1                                                     | -7.0 to -1.2  |                   |
| <b>BMI (kg/m<sup>2</sup>)*</b> |     |                                        |               | <0.001            |     |                                        |            | 0.59              |     |                                                          |               | 0.07              |
| <18.5                          | 13  | 33.2                                   | -148 to 214.4 |                   |     |                                        |            |                   | 12  | 3.2                                                      | -10.5 to 16.9 |                   |
| 18.5-25                        | 508 | 6.9                                    | -26.7 to 40.4 |                   | 218 | 1.4                                    | 0.5 to 3.7 |                   | 410 | -4.8                                                     | -7.9 to -1.8  |                   |
| 25-30                          | 670 | -26.5                                  | -70.5 to 17.6 |                   | 327 | 1.5                                    | 0.5 to 4.4 |                   | 524 | -3.9                                                     | -7.9 to 0.04  |                   |
| 30-35                          | 266 | -5.9                                   | -72.5 to 60.8 |                   | 117 | 1.0                                    | 0.1 to 7.7 |                   | 208 | -4.9                                                     | -11.3 to 1.4  |                   |
| >35                            | 105 | -98.6                                  | -214 to 16.7  |                   |     |                                        |            |                   | 75  | -4.7                                                     | -14.6 to 5.1  |                   |
| <b>Smoking Status</b>          |     |                                        |               | 0.047             |     |                                        |            | 0.19              |     |                                                          |               | 0.005             |
| Ever Smoker                    | 842 | 28.8                                   | 11.8 to 45.9  |                   | 361 | 0.8                                    | 0.5 to 1.4 |                   | 637 | -6.8                                                     | -8.8 to -4.8  |                   |
| Never Smoker                   | 780 | 47.4                                   | 30.4 to 64.4  |                   | 379 | 1.3                                    | 0.7 to 2.5 |                   | 604 | -3.9                                                     | -5.8 to -1.9  |                   |

**Definition of abbreviations:** BMI: body mass index; SAT: subcutaneous adipose tissue; CI: confidence interval; HAA: high attenuation areas; ILA: interstitial lung abnormalities; FVC: forced vital capacity

\*Subgroup analysis not performed in subjects with BMI <18.5 for ILA and FVC (N=4 for ILA, N=12 for FVC), and BMI >35 for ILA (N=43) due to small sample size.

Models are adjusted for age, sex, race, height, smoking status, percent emphysema, and cigarette pack-years. HAA models are additionally adjusted for study site, imaged lung volume, and radiation dose;



**e-Table 7:** Associations of pericardial adipose tissue volume with high attenuation areas, interstitial lung abnormalities, and forced vital capacity within pre-specified subgroups by age and smoking status.

|                       | N    | Change in HAA per doubling in PAT volume | 95% CI       | P for interaction | N    | Change in ILA per doubling in PAT volume | 95% CI      | P for interaction | N   | Change in percent predicted FVC per doubling in PAT volume | 95% CI        | P for interaction |
|-----------------------|------|------------------------------------------|--------------|-------------------|------|------------------------------------------|-------------|-------------------|-----|------------------------------------------------------------|---------------|-------------------|
| <b>Age</b>            |      |                                          |              | 0.48              |      |                                          |             | 0.66              |     |                                                            |               | 0.55              |
| <65                   | 3756 | 64.4                                     | 54.6 to 74.3 |                   | 1592 | 1.5                                      | 1.1 to 2.0  |                   | 861 | -5.3                                                       | -6.7 to -3.9  |                   |
| ≥65                   | 2934 | 66.2                                     | 53.7 to 78.6 |                   | 802  | 1.2                                      | 0.9 to 1.5  |                   | 539 | -5.8                                                       | -8.1 to -3.5  |                   |
| <b>BMI*</b>           |      |                                          |              | 0.25              |      |                                          |             | 0.24              |     |                                                            |               | 0.08              |
| 18.5-25               | 1866 | 34.5                                     | 16.1 to 53.0 |                   | 685  | 1.3                                      | 0.8 to 2.2  |                   | 418 | -3.5                                                       | -6.4 to -0.5  |                   |
| 25-30                 | 2616 | 19.4                                     | 5.6 to 33.2  |                   | 943  | 1.4                                      | 0.97 to 2.1 |                   | 575 | -4.4                                                       | -6.8 to -2.0  |                   |
| 30-35                 | 1401 | 20.5                                     | 2.4 to 38.7  |                   | 484  | 1.3                                      | 0.8 to 2.3  |                   | 289 | -6.5                                                       | -10.2 to -2.9 |                   |
| >35                   | 750  | 59.3                                     | 37.1 to 81.5 |                   | 250  | 0.4                                      | 0.2 to 0.9  |                   | 109 | -5.7                                                       | -10.8 to -0.5 |                   |
| <b>Smoking Status</b> |      |                                          |              | 0.61              |      |                                          |             | 0.46              |     |                                                            |               | 0.03              |
| Ever Smoker           | 3449 | 66.7                                     | 55.8 to 77.5 |                   | 1130 | 1.2                                      | 0.9 to 1.6  |                   | 752 | -7                                                         | -8.7 to -5.4  |                   |
| Never Smoker          | 3315 | 66.9                                     | 55.6 to 78.1 |                   | 1289 | 1.1                                      | 0.8 to 1.5  |                   | 663 | -3.7                                                       | -5.6 to -1.8  |                   |

**Definition of abbreviations:** BMI: body mass index

\*Subgroup analysis not performed in subjects with BMI less than 18.5 due to small sample size (N=57 for HAA, N=5 for ILA, N=9 for FVC) and exclude radiation dose due to collinearity

**e-Table 8:** Associations of visceral adipose tissue area with high attenuation areas, interstitial lung abnormalities, and forced vital capacity within pre-specified subgroups by age and smoking status

|                       | N    | Change in HAA per doubling in VAT area | 95% CI        | P for interaction | N   | Change in ILA per doubling in VAT area | 95% CI      | P for interaction | N   | Change in percent predicted FVC per doubling in VAT area | 95% CI       | P for interaction |
|-----------------------|------|----------------------------------------|---------------|-------------------|-----|----------------------------------------|-------------|-------------------|-----|----------------------------------------------------------|--------------|-------------------|
| <b>Age</b>            |      |                                        |               | 0.73              |     |                                        |             | 0.62              |     |                                                          |              | 0.48              |
| <65                   | 1070 | 36.5                                   | 19.2 to 53.8  |                   | 582 | 1.0                                    | 0.7 to 1.7  |                   | 863 | -5.6                                                     | -6.9 to -4.2 |                   |
| ≥65                   | 768  | 50.0                                   | 29.1 to 71.0  |                   | 262 | 2.0                                    | 1.1 to 3.5  |                   | 541 | -5.3                                                     | -7.4 to -3.2 |                   |
| <b>BMI*</b>           |      |                                        |               | 0.09              |     |                                        |             | 0.04              |     |                                                          |              | 0.04              |
| 18.5-25               | 525  | 7.4                                    | -18.9 to 33.7 |                   | 226 | 0.9                                    | 0.4 to 1.9  |                   | 418 | -4.5                                                     | -6.8 to -2.2 |                   |
| 25-30                 | 747  | -17.5                                  | -44.9 to 9.9  |                   | 357 | 2.4                                    | 1.1 to 5.0  |                   | 572 | -6.0                                                     | -8.5 to -3.5 |                   |
| 30-35                 | 376  | 4.3                                    | -33.5 to 42.1 |                   | 164 | 2.9                                    | 0.9 to 9.1  |                   | 281 | -5.9                                                     | -9.9 to -1.8 |                   |
| >35                   | 177  | 39.1                                   | -16.2 to 94.4 |                   | 77  | 0.3                                    | 0.01 to 5.3 |                   | 121 | -2.3                                                     | -8.9 to 4.3  |                   |
| <b>Smoking Status</b> |      |                                        |               | 0.42              |     |                                        |             | 0.88              |     |                                                          |              | <0.001            |
| Ever Smoker           | 1035 | 31.6                                   | 13.7 to 49.5  |                   | 432 | 1.1                                    | 0.7 to 1.8  |                   | 739 | -7.6                                                     | -9.2 to -6.0 |                   |
| Never Smoker          | 888  | 50.5                                   | 31.7 to 69.4  |                   | 429 | 1.4                                    | 0.8 to 2.5  |                   | 665 | -3.1                                                     | -4.8 to -1.4 |                   |

**Definition of abbreviations:** BMI: body mass index; VAT: visceral adipose tissue; CI: confidence interval; HAA: high attenuation areas; ILA: interstitial lung abnormalities; FVC: forced vital capacity

Models are adjusted for age, sex, race, smoking status, percent emphysema, and cigarette pack-years. HAA models are additionally adjusted for study site, imaged lung volume, and radiation dose.

\*Subgroup analysis not performed in subjects with BMI less than 18.5 due to small sample size (N=13 for HAA, N=5 for ILA, N=12 for FVC) and exclude radiation dose due to collinearity

**e-Table 9:** The proportion of the total effect of pericardial adipose tissue volume or visceral adipose tissue on HAA that is explained by each biomarker in fully adjusted models

|                    | <b>Pericardial Adipose Tissue and HAA</b> | <b>Visceral Adipose Tissue and HAA</b> |
|--------------------|-------------------------------------------|----------------------------------------|
| Interleukin-6      | 0.08                                      | 0.17                                   |
| Leptin             | NA                                        | 0.18                                   |
| Adiponectin        | NA                                        | 0.04                                   |
| C-reactive protein | NA                                        | 0.11                                   |

\*Fully adjusted models including age, sex, race, smoking status, percent emphysema, cigarette pack-years, study site, imaged lung volume, and radiation dose.

**e-Figure 1:** Flow diagram of study inclusion

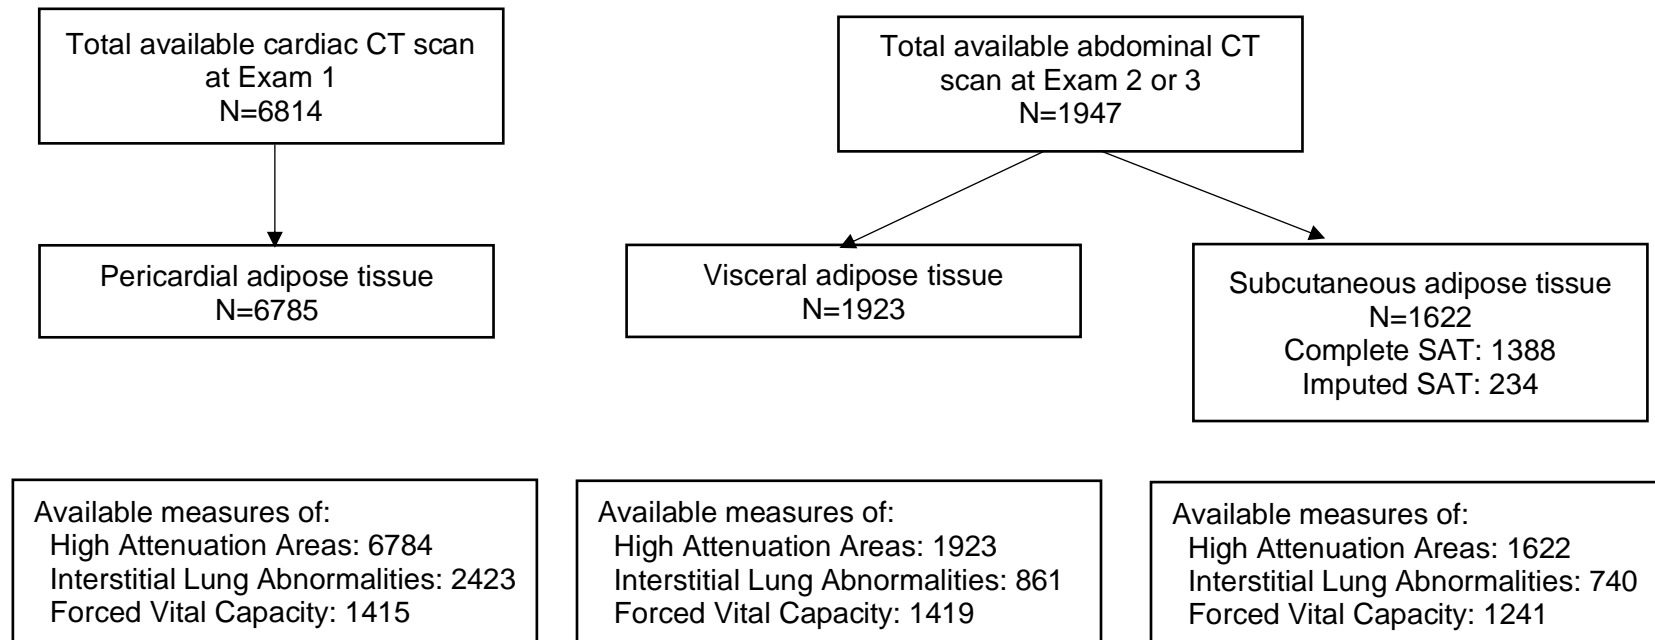

**e-Figure 2:** Association between abdominal subcutaneous adipose tissue area and (A) high attenuation areas, (B) interstitial lung abnormalities, and (C) forced vital capacity. Models are adjusted for age, sex, smoking status, and visceral adipose tissue area.

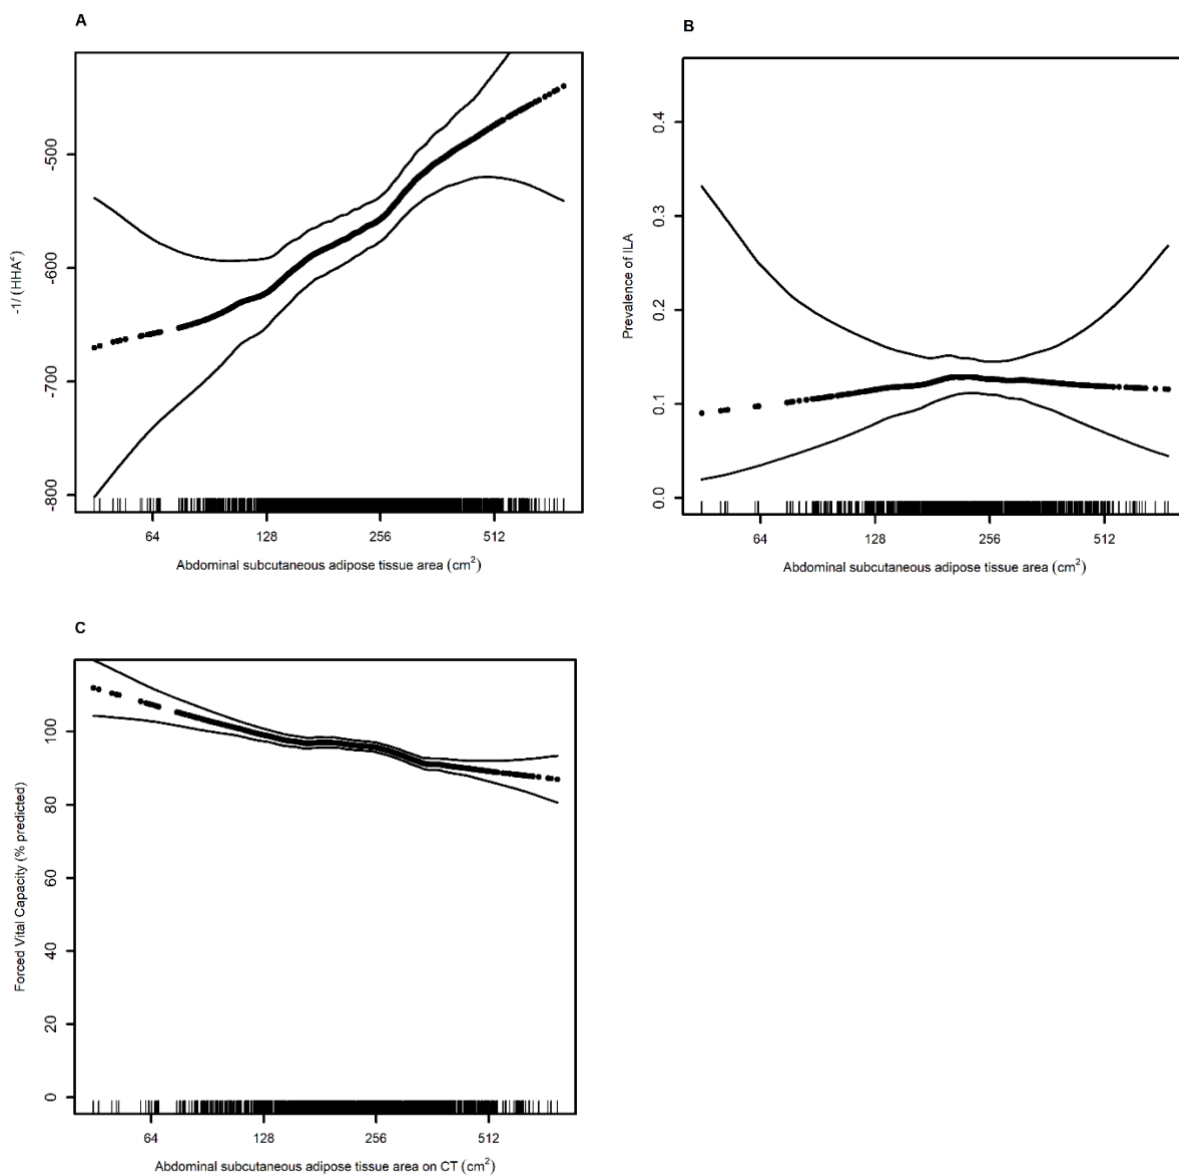

**e-Figure 3:** Scatter plots for the correlation of pericardial adipose tissue volume with plasma (A) interleukin-6 ( $\rho = 0.25$ ,  $p < 0.0001$ ), (B) leptin ( $\rho = 0.13$ ,  $p < 0.001$ ), (C) adiponectin ( $\rho = -0.16$ ,  $p < 0.0001$ ), (D) c-reactive protein ( $\rho = 0.14$ ,  $p < 0.0001$ ), (E) resistin ( $\rho = 0.08$ ,  $p = 0.002$ ), and (F) tumor necrosis factor alpha ( $\rho = 0.14$ ,  $p < 0.0001$ ).

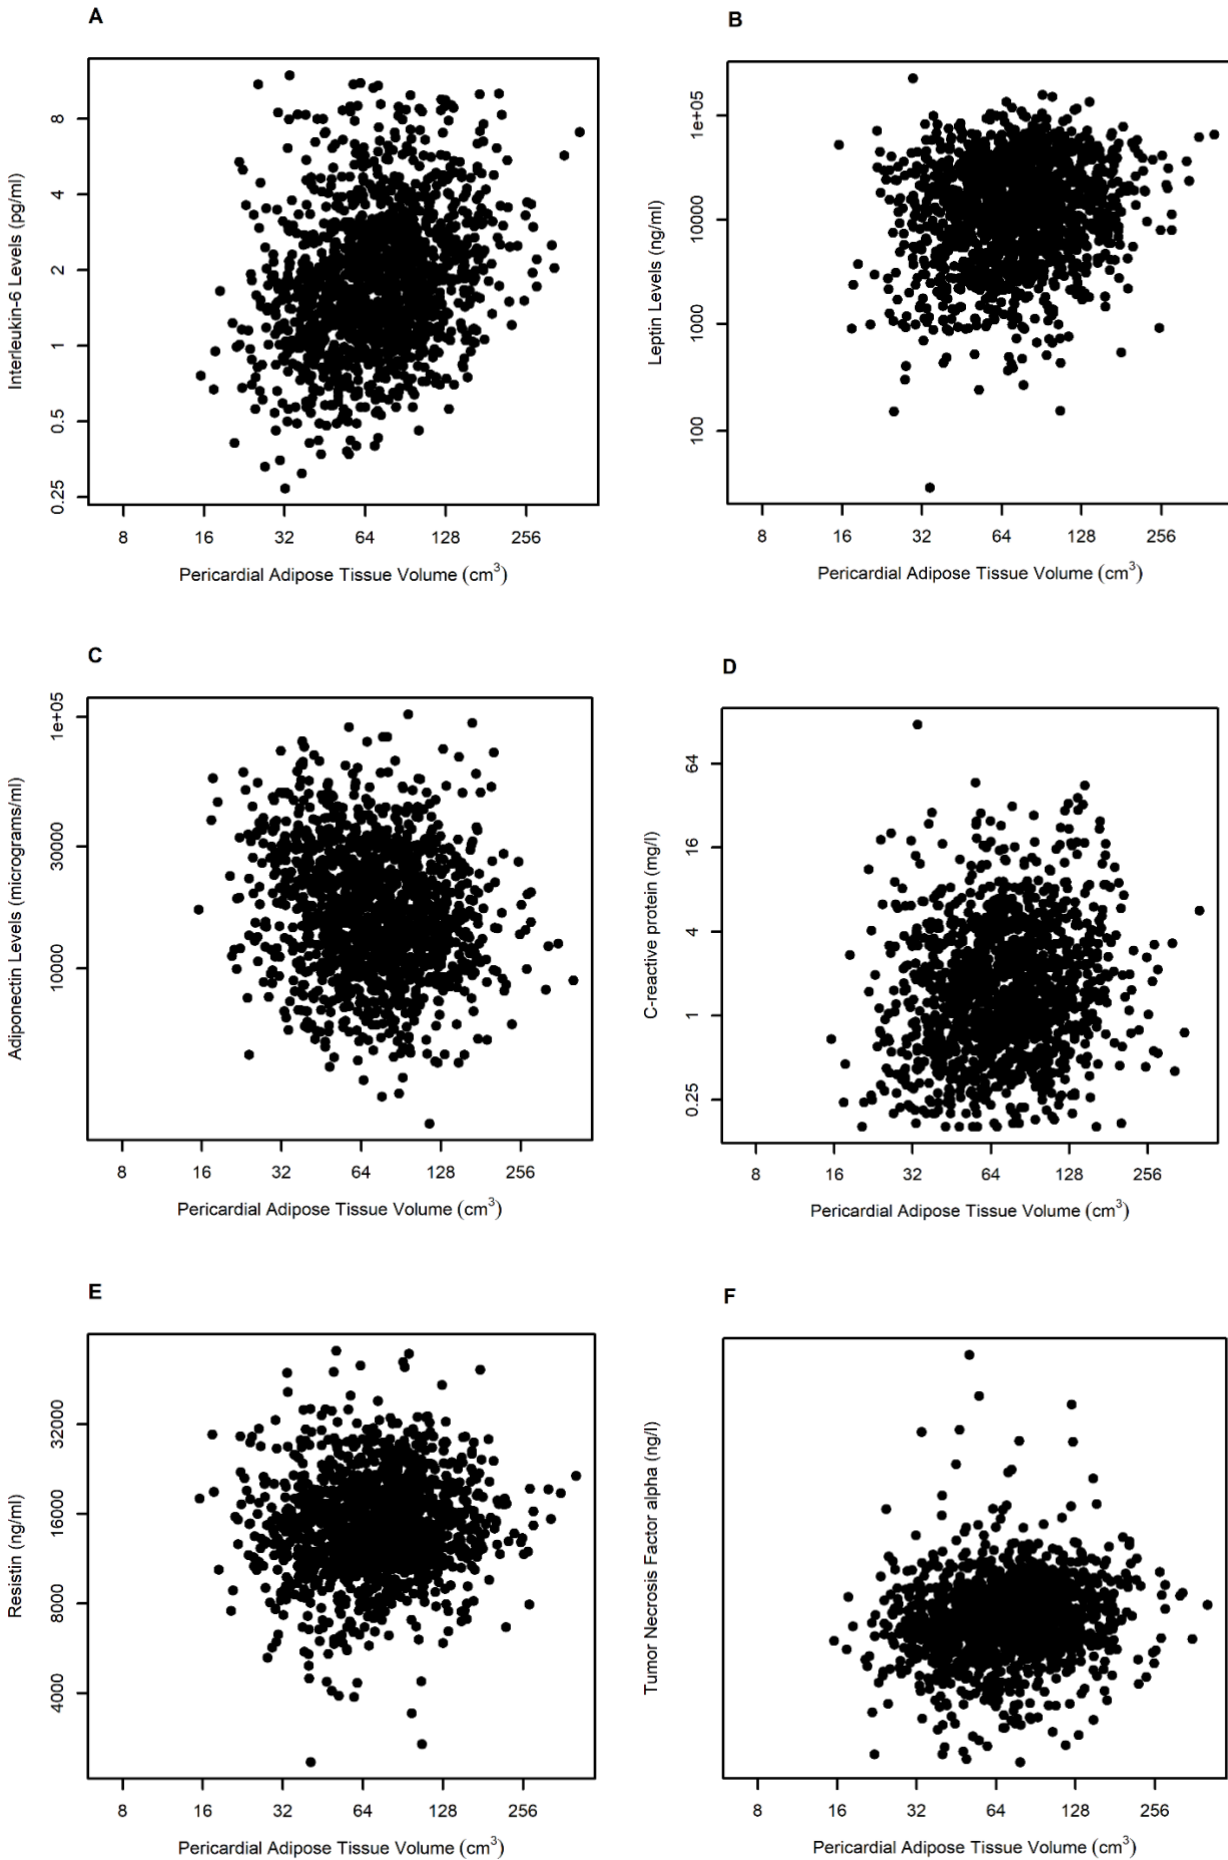

**e-Figure 4:** Scatter plots for the association between abdominal visceral adipose tissue area and plasma (A) interleukin-6 ( $r= 0.32, p<0.001$ ), (B) leptin ( $r= 0.28, p<0.001$ ), (C) adiponectin ( $r= -0.31, p<0.001$ ), (D) c-reactive protein ( $r= 0.25, p<0.001$ ), (E) resistin ( $r= 0.07, p=0.01$ ), and (F) tumor necrosis factor alpha ( $r= 0.12, p=0.001$ ).

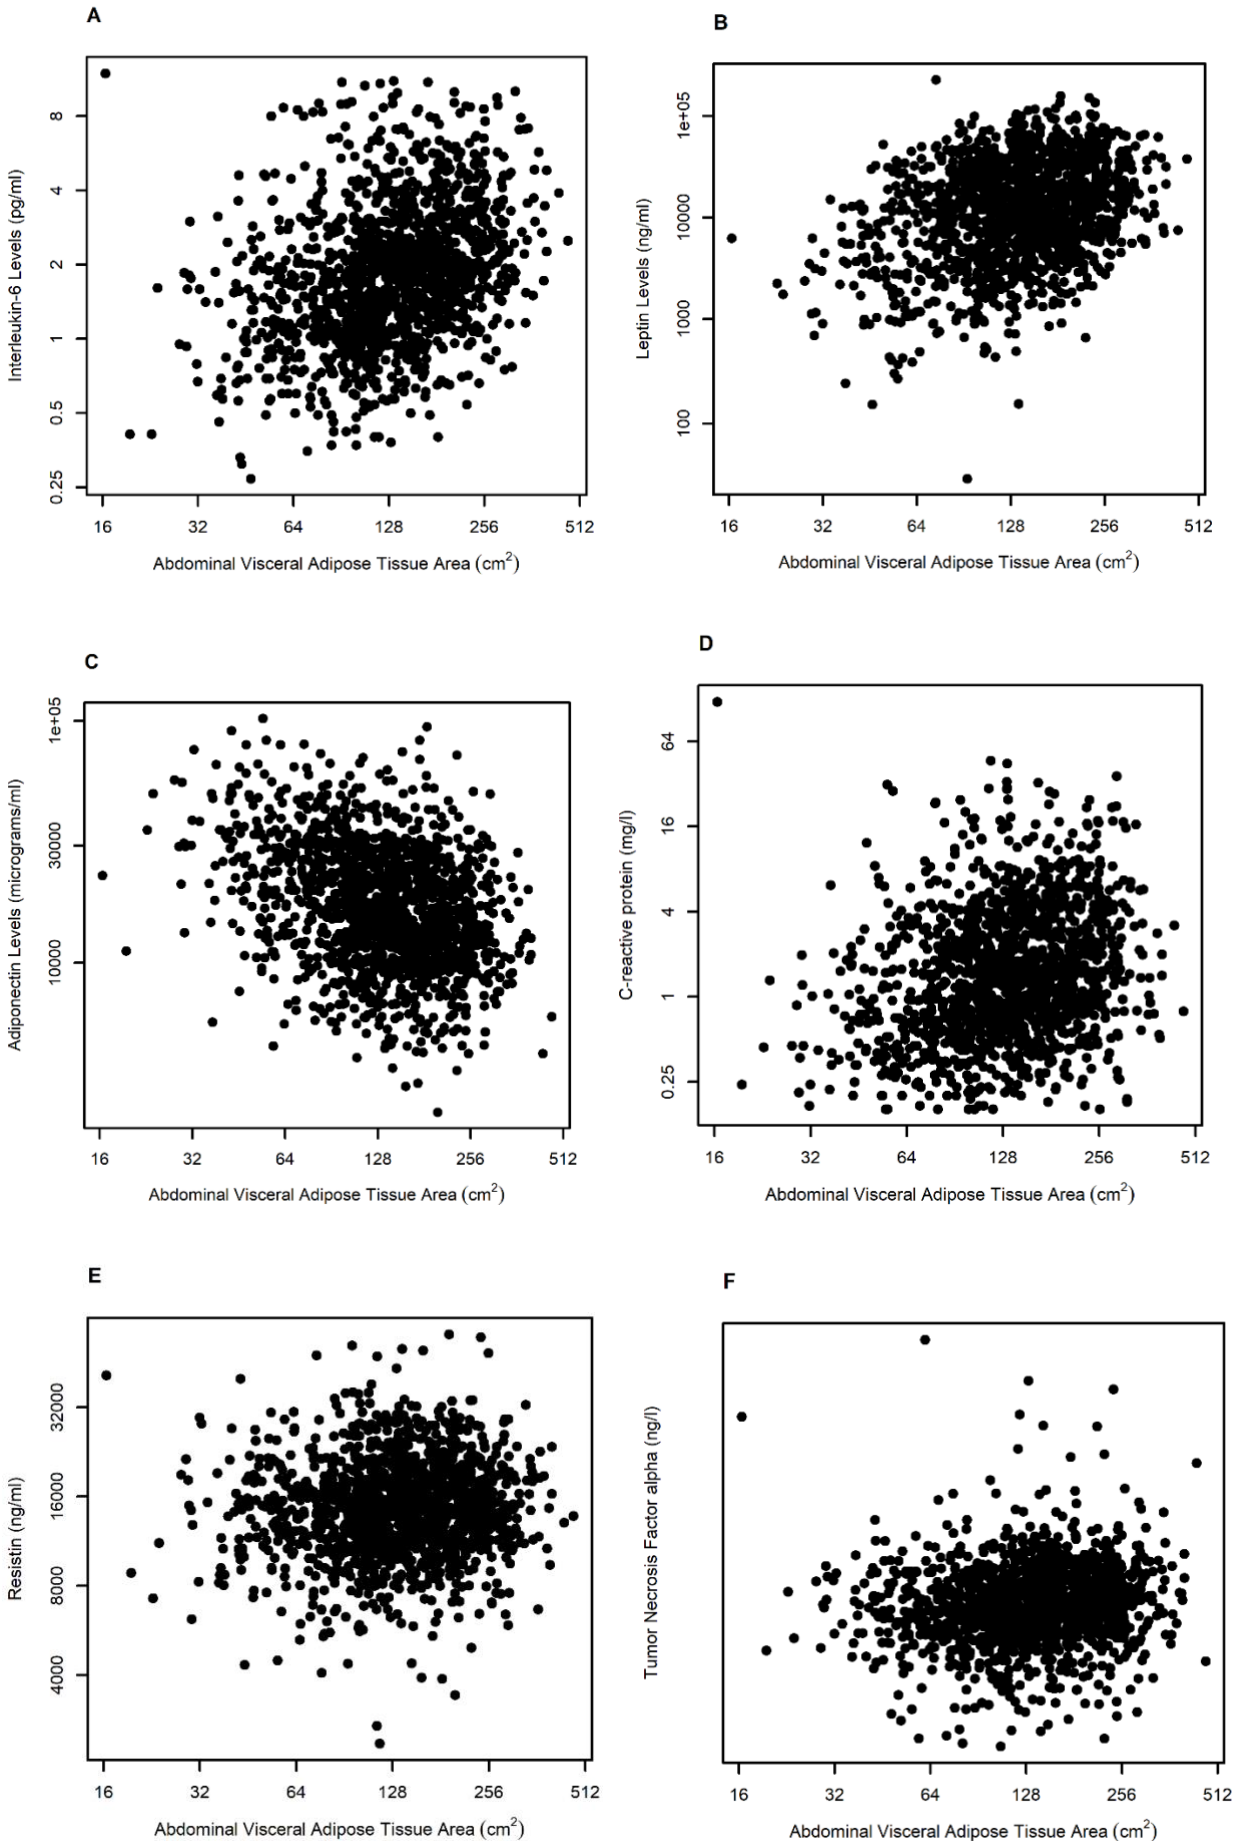

Supplement: mmc1.pdf [file mmc1.pdf]
